# Supplementary material for: Risk Model–Based Lung Cancer Screening and Racial and Ethnic Disparities in the US
Source: PubMed Central journal article supplement (PMC10603577; doi:10.1001/jamaoncol.2023.4447), 2023-10-26
Supplement: jamaoncol-e234447-s002.pdf [file jamaoncol-e234447-s002.pdf]

## Data Sharing Statement

Choi. Risk Model–Based Lung Cancer Screening and Racial and Ethnic Disparities in the US. *JAMA Oncol*. Published October 26, 2023. doi:10.1001/jamaoncol.2023.4447

### Data

**Data available:** No

### Additional Information

**Explanation for why data not available:** The data underlying this analysis were provided by the Multiethnic Cohort Study (MEC) under data use agreement. Researchers interested in the MEC data may submit an inquiry online: <https://www.uhcancercenter.org/for-researchers/mecdata-sharing>.
